# Supplementary material
Source: PubMed Central journal article supplement (PMC4725314)
Supplement: NIHMS749963-supplement-Supporting_files.pdf [file NIHMS749963-supplement-Supporting_files.pdf]

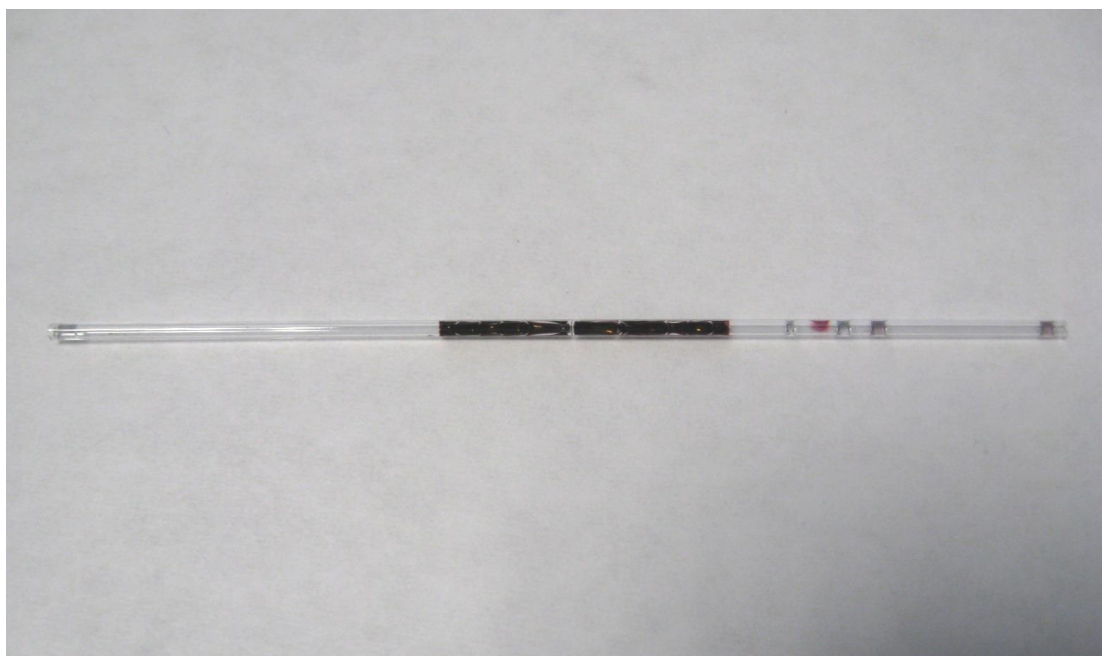

**Figure S1:** Photograph of a reduced gold sol-gel capillary.

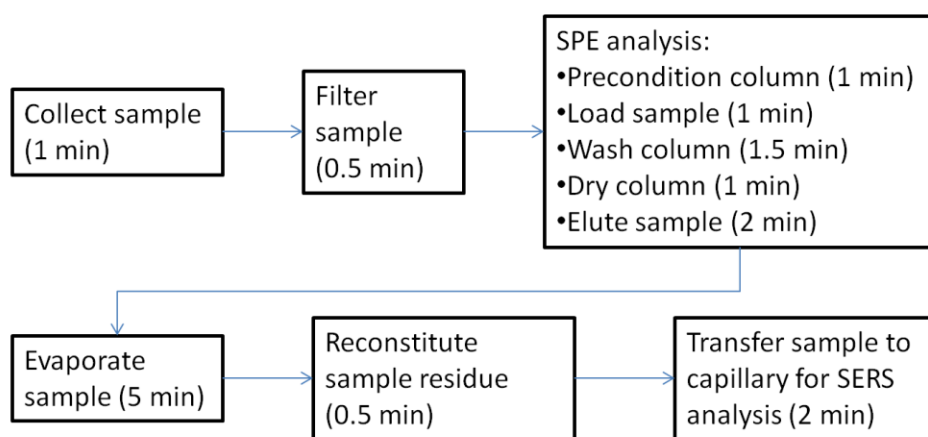

**Figure S2:** Schematic of the final method used to analyze cocaine in saliva samples.
